# Supplementary material
Source: PubMed Central journal article supplement (PMC2575334)
Supplement: 0802814105_0802814105SI.pdf [file 0802814105_0802814105SI.pdf]

# Supporting Information

Zhou *et al.* 10.1073/pnas.0802814105

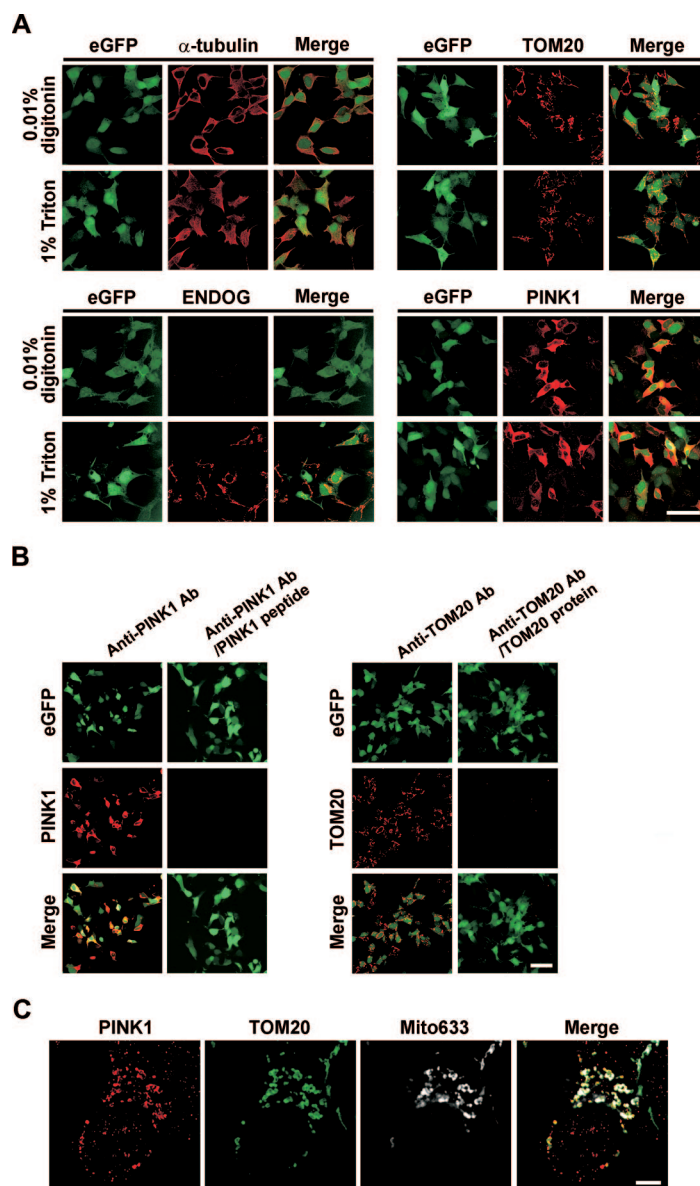

**Fig. S1.** (A) SH-SY5Y cells overexpressing PINK1 are treated and immunostained as in Fig. 1 by using the anti-PINK1<sub>175–250</sub> antibody. Scale bar, 50  $\mu$ m. (B) SH-SY5Y cells overexpressing PINK1 are immunostained with the anti-PINK1<sub>175–250</sub> antibody and the anti-TOM20 antibody (red), respectively. For these two antibodies, PINK1 blocking peptide and TOM20 recombinant are used to confirm that immunostaining is abolished in the presence of an excess of antigen. eGFP is used as a general cell marker (green). Scale bar, 50  $\mu$ m. (C) In SH-SY5Y cells expressing PINK1 stably, PINK1 immunofluorescent signal (red) colocalizes with TOM20 (green) and MitoTracker-Deep Red 633 (Mito633) (white). Scale bar, 5  $\mu$ m.

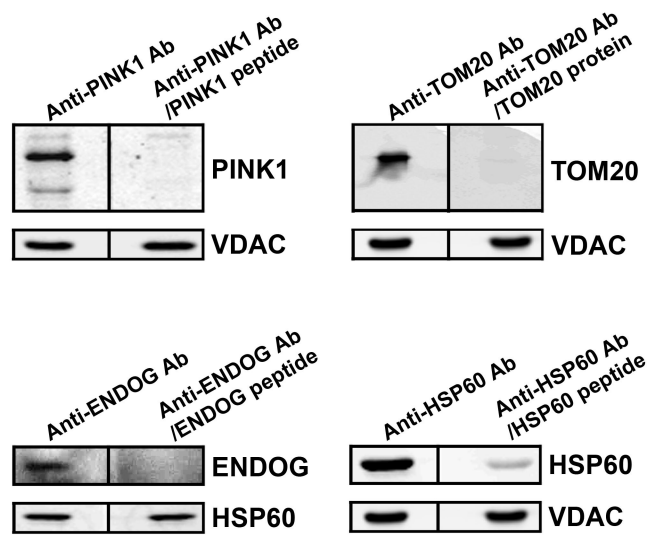

**Fig. S2.** Confirmation of antibody specificities. Mitochondrial fractions from SH-SY5Y cells overexpressing PINK1 are used for Western blot analyses using the anti-PINK1<sub>175-250</sub>, anti-TOM20, anti-ENDOG, or anti-HSP60 antibodies. For each of these antibodies, their respective blocking peptides or recombinant proteins are used to confirm that the specific immunoreactive bands are abolished in the presence of an excess of antigen. VDAC and HSP60 are used as protein loading controls.

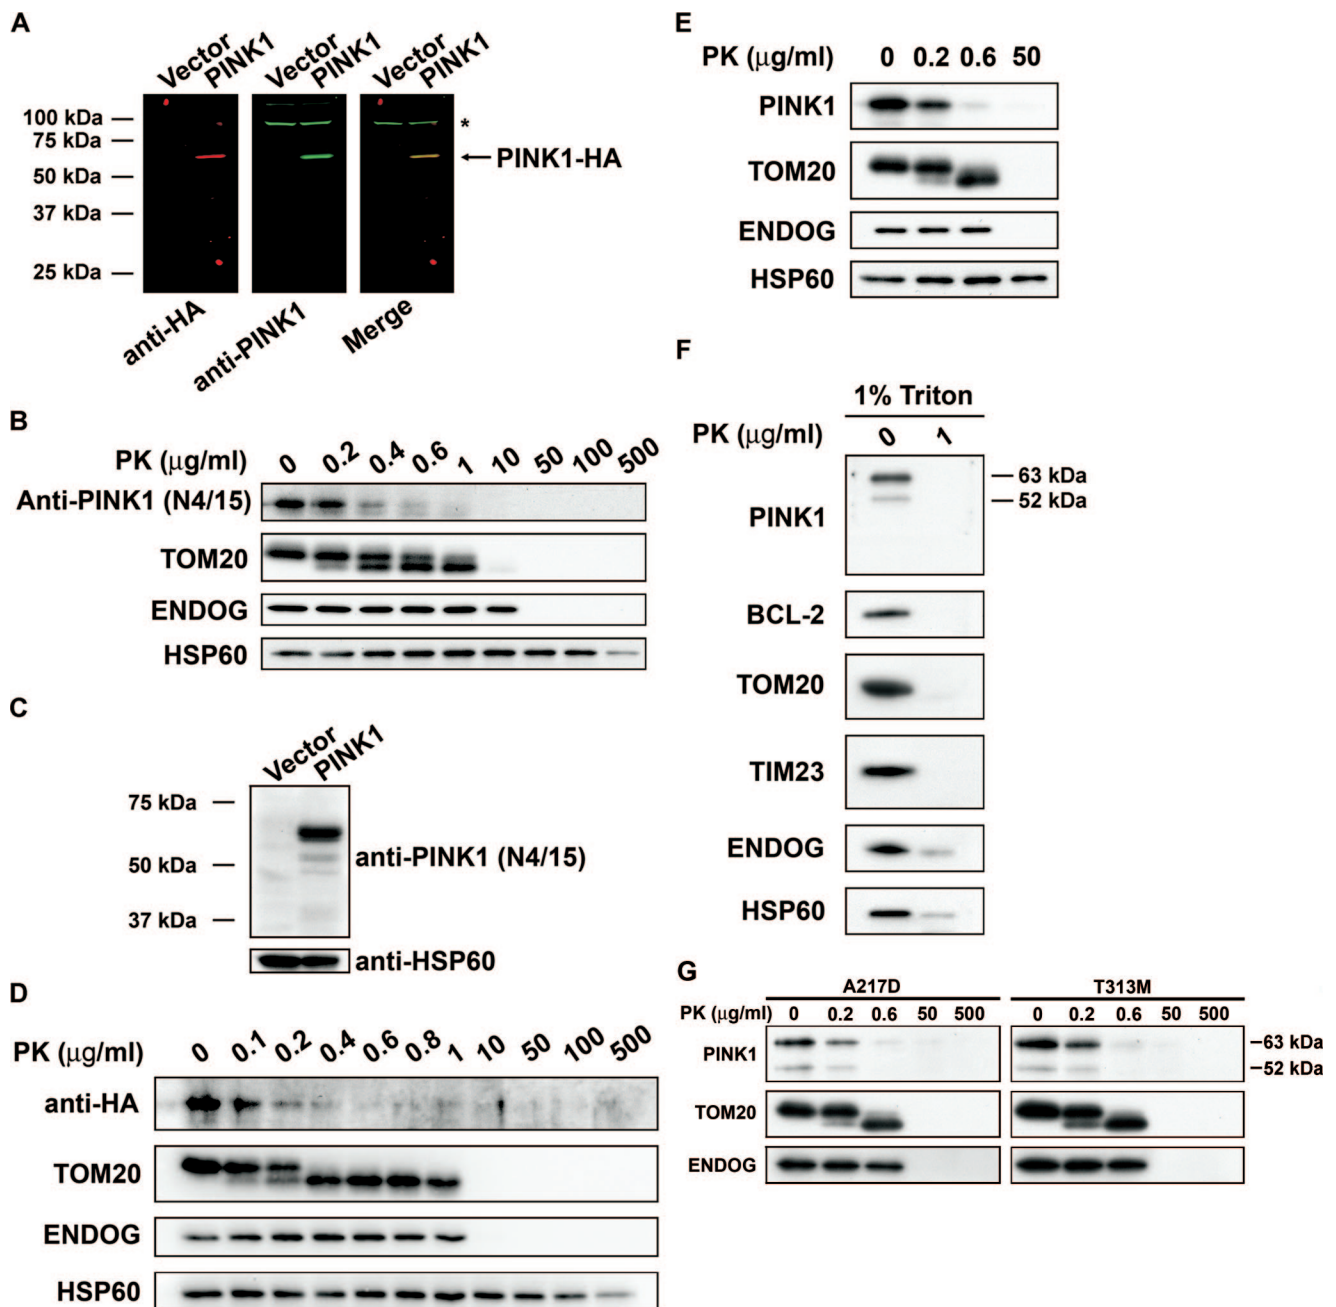

**Fig. S3.** (A) SH-SY5Y cells transfected with empty vector (Vector) or PINK1-HA (PINK1) stably are harvested and the whole-cell lysates are analyzed by Western blot analysis. Both the anti-PINK1<sub>175–250</sub> and the anti-HA antibodies detect full-length PINK1 (arrow) with a size of  $\approx 63$  kDa and the cleaved  $\approx 52$ -kDa species in PINK1-overexpressing cells but not in vector control cells. By Odyssey Infrared Imaging system, anti-HA and anti-PINK1 antibodies reveal overlapping signals. \*, nonspecific bands. (B) Mitochondria isolated from MES23.5 cells expressing PINK1 stably are treated with PK. PINK1 is detected by the anti-PINK1 N4/15 antibody. (C) Anti-PINK1 N4/15 antibody specifically detects overexpressed PINK1. (D) PK protection assay on purified mitochondria from SH-SY5Y expressing PINK1-HA using anti-HA antibodies. (E) Mitochondria isolated from M17 cells expressing PINK1 stably are used for PK protection assay. (F) Mitochondria isolated from SH-SY5Y cells expressing PINK1 stably are lysed with Triton X-100 and then used for PK digestion, followed by Western blot analysis. All proteins are completely digested. (G) Mitochondria isolated from SH-SY5Y cells expressing PINK1 mutants (A217D and T313M) stably are processed as in Fig. 2C. PINK1<sub>175–250</sub> antibody is used in E–G.



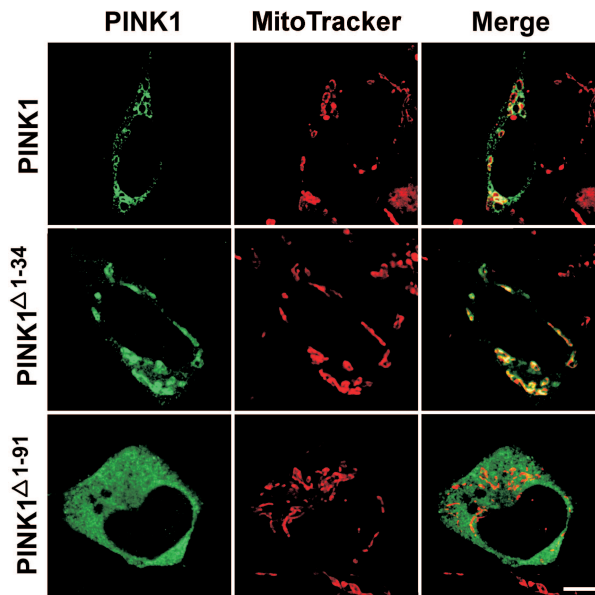

**Fig. S5.** Mitochondrial localization of representative PINK1 constructs. In SH-SY5Y cells transiently transfected with PINK1 (*Top*) and PINK1 $\Delta$ 1-34 (*Middle*), PINK1 immunofluorescent signals (green) localize with Mitotracker Red CMXRos signals (red), indicating that these PINK1 constructs colocalize with mitochondria. On the contrary, in PINK1 $\Delta$ 1-91 transfected cells (*Bottom*), the PINK1 signal is more homogeneously distributed throughout the cytoplasm. PINK1<sub>175-250</sub> antibody is used for detecting PINK1. Scale bar, 5  $\mu$ m.



**Table S1. Western blotting using various anti-PINK1 antibodies**

| Antibody                            | Epitope <sup>†</sup> |            | Overexpression in cells |       | Endogenous in tissue |                    |                    |       |
|-------------------------------------|----------------------|------------|-------------------------|-------|----------------------|--------------------|--------------------|-------|
|                                     | Human                | Mouse, %   | Human                   | Mouse | Cells                | Mice <sup>WT</sup> | Mice <sup>KO</sup> | Human |
| BC100–494 <sup>‡</sup> (Novus)      | 175–250 aa           | 72%        | +                       | —     | —                    | —                  | —                  | —     |
| N4/15 (NeuroMab)                    | 112–496 aa           | 82%        | +                       | +     | —                    | —                  | —                  | —     |
| NB100–493 (Novus)                   | 1–50 aa              | 74%        | +                       | —     | —                    | —                  | —                  | —     |
| 10006283 (Cayman)                   | 484–504 aa           | 86%        | +                       | ?     | —                    | —                  | —                  | —     |
| N4/49 (NeuroMab)                    | 112–496 aa           | 82%        | —                       | ?     | —                    | —                  | —                  | ?     |
| PAB-10983 (Orbigen)                 | 1–18 aa              | 100%       | —                       | —     | —                    | —                  | —                  | —     |
| IMG-4942 (Imgenex)                  | 258–274 aa           | 82%        | —                       | ?     | —                    | ?                  | ?                  | ?     |
| BC100–644 (Novus)                   | 258–274 aa           | 82%        | —                       | +     | —                    | —                  | —                  | —     |
| BC100–505 (Novus)                   | 84%                  | 400–500 aa | —                       | +     | —                    | —                  | —                  | —     |
| BC100–506 (Novus)                   | 84%                  | 550–580 aa | —                       | ?     | —                    | —                  | —                  | —     |
| sc-32584 (Santa Cruz Biotechnology) | —                    | ?          | —                       | ?     | —                    | ?                  | ?                  | —     |
| Ab1 <sup>§</sup>                    | —                    | ?          | —                       | ?     | —                    | —                  | —                  | ?     |
| Ab2 <sup>§</sup>                    | —                    | ?          | —                       | ?     | —                    | —                  | —                  | ?     |
| Culvenor 04/8 <sup>¶</sup>          | —                    | ?          | —                       | ?     | —                    | —                  | —                  | —     |
| Ab3 <sup>  </sup>                   | 135–149 aa           | 60%        | —                       | ?     | —                    | ?                  | ?                  | ?     |

Various anti-PINK1 antibodies, either commercially available or acquired from other researchers, were tested for their ability to detect overexpressed PINK1 or endogenous PINK1 using both cell and mouse brain extracts; siRNA PINK1 knockdown is used as a control. Mammalian cell lines tested were COS7, HEK293, HEK293T, SH-SY5Y, M17, MES23.5, HeLa. +, detected specific PINK1 bands by Western blotting; —, no detected specific PINK1 bands by Western blotting; ?, not tested.

<sup>†</sup>Percentage values refer to the homology percentage.

<sup>‡</sup>BC100–494 from Novus can detect endogenous PINK1 in SH-SY5Y cells upon MG132 treatment.

<sup>§</sup>Provided by Anurag Tandon, University of Toronto, Toronto, ON, Canada.

<sup>¶</sup>Provided by Janetta Culvenor, University of Melbourne, Melbourne, Australia.

<sup>||</sup>Provided by Sonia Gandhi, Institute of Neurology and National Hospital for Neurology and Neurosurgery, Queen Square, London, UK.
